# Supplementary material for: Branched chain amino acids and major depressive disorder in a sample of healthy, non-obese people.
Source: Research Square preprint supplement (doi:10.21203/rs.3.rs-5661012/v1), 2024-12-30
Supplement: Supplementary file 1 [file a8e44cafefce4946d962d2a4.docx]

**Supplementary information**

**Supplementary table 1:** comparison of included and excluded participants.

|  | **Included** | **Excluded** | **p-value** |
| --- | --- | --- | --- |
| Sample size (row %) | 2,182 (43.1%) | 2,882 (56.9%) |  |
| Women (%) | 1,267 (58.1) | 1,440 (50.0) | <0.001 |
| Age (years) | 53.3±8.5 | 61.2±10.6 | <0.001 |
| Living alone (%) | 956 (43.8) | 1,246 (43.2) | 0.62 |
| Smoking categories (%) |  |  | <0.001 |
| Never | 924 (42.4) | 1,111 (39.3) |  |
| Former | 749 (34.3) | 1,134 (40.1) |  |
| Current | 509 (23.3) | 580 (20.6) |  |
| Body mass index (kg/m2) | 24.01±2.93 | 27.89±4.96 | <0.001 |
| BMI categories (%) |  |  | <0.001 |
| Normal | 1,359 (62.3) | 821 (29.1) |  |
| Overweight | 823 (37.7) | 1,137 (40.4) |  |
| Obese | 0 (0) | 859 (30.5) |  |
| Sedentary | 962 (49.6) | 1,443 (64.4) | <0.001 |
| Alcohol categories (%) |  |  | <0.001 |
| Nondrinkers | 456 (20.9) | 825 (28.6) |  |
| Low risk | 1,435 (65.8) | 1,576 (54.7) |  |
| Medium-high | 265 (12.1) | 427 (14.8) |  |
| Very high | 26 (1.2) | 54 (1.9) |  |

BMI, body mass index. Results are expressed as number of participants (column percentage) for categorical variables and as average ± standard deviation for continuous variables. Between-group comparisons performed using chi-square test for categorical variables and student’s t-test for continuous variables.

BMI, body mass index. Results are expressed as number of participants (percentage) for categorical variables and as average ± standard deviation for continuous variables Between-group comparisons performed using chi-square for categorical variables and student’s t-test for continuous variables.
