# Supplementary figures and images for: Branched chain amino acids and major depressive disorder in a sample of healthy, non-obese people.
Source: Research Square preprint supplement (doi:10.21203/rs.3.rs-5661012/v1), 2024-12-30

**Supplementary Fig. 1.** selection procedure, CoLaus|PsyCoLaus study, Lausanne, Switzerland.

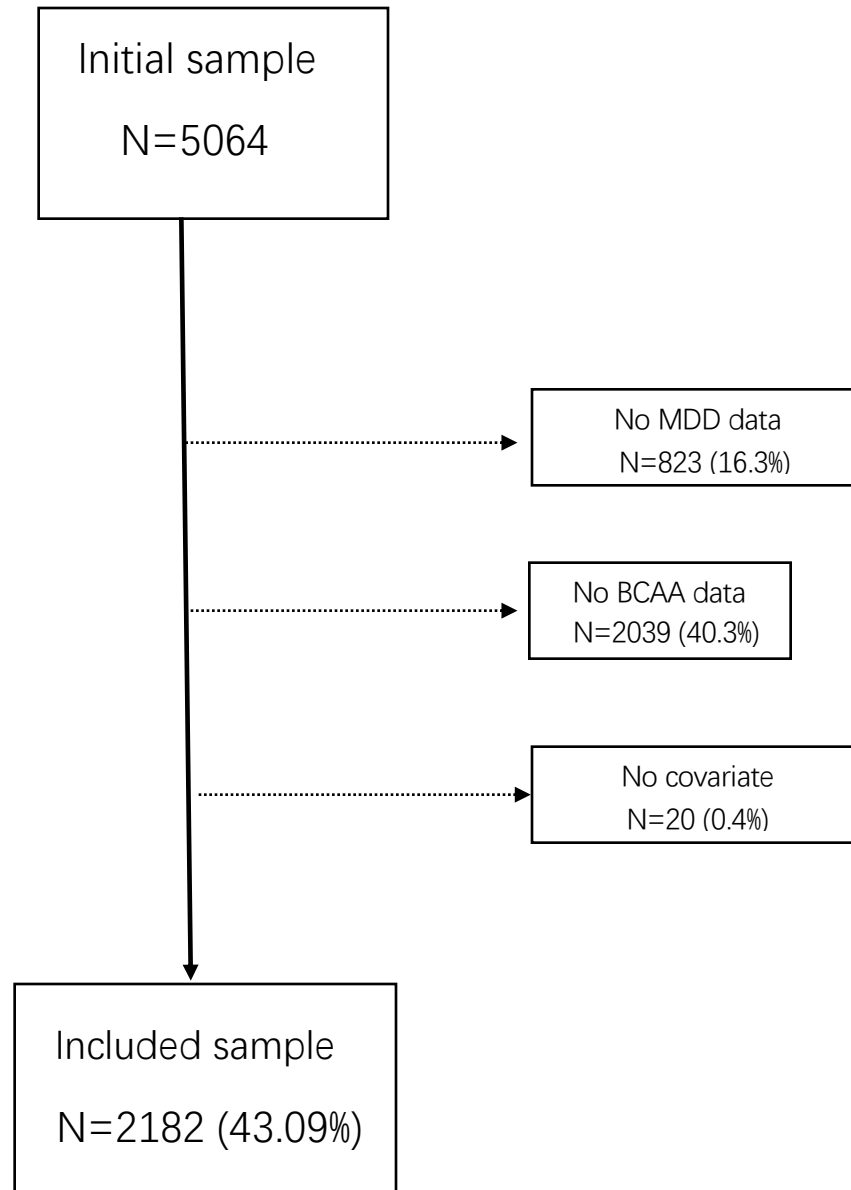

Supplement: Supplementary file 1 [file b5735c5ca0f2cc3872e993d5.pdf]
